# Supplementary material for: Additional value of a combined genetic risk score to standard cardiovascular stratification
Source: PubMed Central journal article supplement (PMC6415604; doi:10.1590/1678-4685-gmb-2017-0173), 2018
Supplement: 1415-4757-GMB-41-04-0173-s001.pdf [file 1415-4757-GMB-41-04-0173-s001.pdf]

## Supplementary to “Additional value of a combined genetic risk score to standard cardiovascular stratification”

**Table S1** – List of the 32 genetic variants previously associated with CAD risk, selected to create the GRS in our Population.

| SNP ID                           | Nearest gene      | Chr | Position              | Genotypic OR (95%CI)              | p value | Allelic OR (95%CI)  | p value | MAF (%) | Potential mechanism of action |
|----------------------------------|-------------------|-----|-----------------------|-----------------------------------|---------|---------------------|---------|---------|-------------------------------|
| rs1333049                        | 9p21.3            | 9   | 22125504              | 1.147 (1.036-1.270) <sup>+</sup>  | 0.008   | 1.155 (1.041-1.282) | 0.007   | 45.8    | Cellular                      |
| rs4977574                        | CDKN2B            | 9   | 22098575              | 1.161 (1.049-1.286) <sup>+</sup>  | 0.004   | 1.172 (1.056-1.302) | 0.003   | 42.0    | Cellular                      |
| rs618675                         | GJA4              | 1   | 34922761              | 1.143 (0.792-1.649) <sup>*</sup>  | 0.475   | 1.046 (0.918-1.191) | 0.502   | 19.6    | Cellular                      |
| rs17228212                       | SMAD3             | 15  | 65245693              | 1.202 (0.888-1.629) <sup>*</sup>  | 0.234   | 1.025 (0.910-1.155) | 0.684   | 25.3    | Cellular                      |
| rs17465637                       | MIA3              | 1   | 222650187             | 1.088 (0.971-1.220) <sup>+</sup>  | 0.148   | 1.088 (0.971-1.220) | 0.147   | 28.6    | Cellular                      |
| rs12190287                       | TCF21             | 6   | 134256218             | 1.230 (1.100-1.375) <sup>+</sup>  | <0.0001 | 1.226 (1.098-1.368) | 0.0003  | 32.7    | Cellular                      |
| rs3825807                        | ADAMTS7           | 15  | 76876166              | 1.073- (0.967-1.191) <sup>+</sup> | 0.185   | 1.074 (0.967-1.194) | 0.181   | 41.2    | Cellular                      |
| rs11556924                       | ZC3HC1            | 7   | 130023656             | 1.227 (1.058-1.423) <sup>*</sup>  | 0.007   | 1.157 (1.037-1.290) | 0.009   | 34.3    | Cellular                      |
| rs1332844                        | PHACTR1           | 6   | 12927312              | 1.113 (1.003-1.235) <sup>+</sup>  | 0.044   | 1.113 (1.003-1.236) | 0.043   | 44.3    | Cellular                      |
| rs2114580                        | PCSK9             | 1   | 55167236              | 1.079 (0.821-1.417) <sup>*</sup>  | 0.587   | 0.974 (0.866-1.096) | 0.665   | 26.3    | Lipids                        |
| rs20455                          | KIF6              | 6   | 39357302              | 1.129 (0.896-1.424) <sup>*</sup>  | 0.306   | 1.060 (0.949-1.184) | 0.302   | 32.8    | Lipids                        |
| rs7412/<br>rs429358 <sup>1</sup> | APOE <sup>1</sup> | 19  | 44908822/<br>44908684 | 1.261 (1.062-1.497) <sup>#</sup>  | 0.008   | 1.231 (1.056-1.435) | 0.008   | 13.4    | Lipids                        |
| rs964184                         | ZNF259            | 11  | 116778201             | 1.131 (0.986-1.298) <sup>+</sup>  | 0.078   | 1.130 (0.986-1.295) | 0.079   | 17.7    | Lipids                        |
| rs599839                         | PSRC1             | 1   | 109279544             | 1.059 (0.933-1.203) <sup>+</sup>  | 0.375   | 1.058 (0.933-1.201) | 0.379   | 21.4    | Lipids                        |
| rs1801133                        | MTHFR 677         | 1   | 11796321              | 1.178 (1.017-1.365) <sup>#</sup>  | 0.029   | 1.114 (0.998-1.243) | 0.055   | 33.5    | Oxidation                     |
| rs1801131                        | MTHFR 1298        | 1   | 11794419              | 0.944 (0.816-1.093) <sup>#</sup>  | 0.443   | 0.958 (0.854-1.075) | 0.465   | 28.0    | Oxidation                     |

| SNP ID     | Nearest gene | Chr | Position  | Genotypic OR (95%CI)             | p value | Allelic OR (95%CI)  | p value | MAF (%) | Potential mechanism of action |
|------------|--------------|-----|-----------|----------------------------------|---------|---------------------|---------|---------|-------------------------------|
| rs705379   | PON -108     | 7   | 96324583  | 1.135 (0.950-1.355) <sup>#</sup> | 0.163   | 1.068 (0.962-1.184) | 0.217   | 46.4    | Oxidation                     |
| rs662      | PON 192      | 7   | 95308134  | 0.836 (0.652-1.072)*             | 0.157   | 0.927 (0.828-1.037) | 0.186   | 30.1    | Oxidation                     |
| rs854560   | PON 55       | 7   | 95316772  | 1.161 (1.044-1.290) <sup>+</sup> | 0.006   | 1.161 (1.044-1.290) | 0.006   | 40.4    | Oxidation                     |
| rs6922269  | MTHFD1L      | 6   | 150931849 | 1.067 (0.804-1.416)*             | 0.653   | 0.996 (0.887-1.118) | 0.943   | 27.3    | Oxidation                     |
| rs5186     | AT1R         | 3   | 148742201 | 1.245 (0.906-1.710)*             | 0.177   | 1.062 (0.942-1.198) | 0.323   | 24.7    | RAS                           |
| rs699      | AGT          | 1   | 230710048 | 0.932 (0.798-1.090) <sup>#</sup> | 0.380   | 0.969 (0.873-1.076) | 0.552   | 42.9    | RAS                           |
| rs4340     | ACE          | 17  | 61565892  | 1.165 (1.001-1.355)*             | 0.048   | 1.083 (0.973-1.205) | 0.143   | 38.1    | RAS                           |
| rs4402960  | IGF2BP2      | 3   | 185793899 | 1.124 (0.876-1.443)*             | 0.358   | 1.020 (0.911-1.141) | 0.736   | 30.8    | Diab/Obes                     |
| rs1326634  | SLC30A8      | 8   | 117172544 | 1.213 (0.914-1.609) <sup>#</sup> | 0.181   | 1.081 (0.961-1.217) | 0.195   | 25.8    | Diab/Obes                     |
| rs266729   | ADIPOQ       | 3   | 186841685 | 1.209 (1.041-1.403) <sup>#</sup> | 0.013   | 1.165 (1.030-1.318) | 0.015   | 23.3    | Diab/Obes                     |
| rs7903146  | TCF7L2       | 10  | 112998590 | 0.961 (0.862-1.072) <sup>+</sup> | 0.480   | 0.962 (0.863-1.072) | 0.482   | 35.3    | Diab/Obes                     |
| rs17782313 | MC4R         | 18  | 60183864  | 1.314 (0.931-1.855)*             | 0.120   | 1.016 (0.896-1.152) | 0.806   | 21.6    | Diab/Obes                     |
| rs1801282  | PPARG        | 3   | 12351626  | 1.427 (0.717-2.843) <sup>#</sup> | 0.309   | 1.164 (0.970-1.396) | 0.102   | 8.8     | Diab/Obes                     |
| rs1884613  | HNF4A        | 20  | 44351775  | 1.159 (0.987-1.360) <sup>#</sup> | 0.072   | 1.106 (0.960-1.273) | 0.163   | 16.2    | Diab/Obes                     |
| rs8050136  | FTO          | 16  | 53782363  | 1.194 (1.026-1.390) <sup>#</sup> | 0.022   | 1.129 (1.016-1.255) | 0.025   | 39.7    | Diab/Obes                     |
| rs1376251  | TAS2R 50     | 12  | 11030119  | 1.556 (0.767-3.155)*             | 0.217   | 1.080 (0.920-1.267) | 0.349   | 11.9    | Diab/Obes                     |

Legend: SNP – Single Nucleotide Polymorphism; Chr – Chromosome; OR – Odds Ratio; CI – Confidence Interval; MAF – Minor Allele Frequency; RAS – Renin-Angiotensin System; Diab/Obes – Diabetes/Obesity; <sup>+</sup>Additive model; \*Recessive model; <sup>#</sup>Dominant model; <sup>1</sup>Resulting from a Haplotype; Table shows susceptibility loci for CAD, genotypic and allelic ORs and p values for the lead SNP within each locus from GWAS and candidate gene studies. Genotypic ORs are given for additive, recessive or dominant model. Potential mechanism of action is on the basis of what is already known about the function of the nearby genes. It includes “Cellular” (genes associated to cell cycle, cellular migration and inflammation); “Oxidation” (genes involved in pro-oxidative status) and associated with modifiable risk factors such as “Lipids” metabolism, hypertension (“RAS”) and Diabetes/Obesity.
