# Supplementary material for: Additional value of a combined genetic risk score to standard cardiovascular stratification
Source: PubMed Central journal article supplement (PMC6415604; doi:10.1590/1678-4685-gmb-2017-0173), 2018
Supplement: 1415-4757-GMB-41-04-0173-s002.pdf [file 1415-4757-GMB-41-04-0173-s002.pdf]

## Supplementary to “Additional value of a combined genetic risk score to standard cardiovascular stratification”

**Table S2** – Reclassification table comparing predicted CAD risk with and without GRS.

| Predicted risk (without GRS)    | Reclassified predicted risk (with GRS) |                  |                  |                  | % Increase   | % Decrease |
|---------------------------------|----------------------------------------|------------------|------------------|------------------|--------------|------------|
| <b>FRS &lt;10%</b>              |                                        |                  |                  |                  |              |            |
| <b>CAD patients (n=629)</b>     | <25%                                   | 25%-50%          | 50%-75%          | 75%-100%         |              |            |
| <25%                            | 13 <sup>◊</sup>                        | 4*               | 0                | 0                | 0.3%         | 0%         |
| 25%-50%                         | 41*                                    | 105 <sup>◊</sup> | 16*              | 0                | 1%           | 2.6%       |
| 50%-75%                         | 0                                      | 50*              | 220 <sup>◊</sup> | 35*              | 2.2%         | 3.2%       |
| 75%-100%                        | 0                                      | 0                | 13*              | 132 <sup>◊</sup> | 0%           | 0.8%       |
| <i>NRI CAD patients</i>         |                                        |                  |                  |                  | <b>-7.8%</b> |            |
| <b>Healthy controls (n=683)</b> |                                        |                  |                  |                  |              |            |
| <25%                            | 83 <sup>◊</sup>                        | 16*              | 0                | 0                | 1.2%         | 0%         |
| 25%-50%                         | 157                                    | 147 <sup>◊</sup> | 12*              | 0                | 0.9%         | 11.9%      |
| 50%-75%                         | 0                                      | 63*              | 167 <sup>◊</sup> | 9*               | 0.7%         | 4.8%       |
| 75%-100%                        | 0                                      | 0                | 5*               | 24 <sup>◊</sup>  | 0%           | 0.4%       |
| <i>NRI controls</i>             |                                        |                  |                  |                  | <b>27.5%</b> |            |
| <i>NRI total</i>                |                                        |                  |                  |                  | <b>19.7%</b> |            |
| <b>10%≤FRS≤20%</b>              |                                        |                  |                  |                  |              |            |
| <b>CAD patients (n=583)</b>     | <25%                                   | 25%-50%          | 50%-75%          | 75%-100%         | % Increase   | % Decrease |
| <25%                            | 0                                      | 0                | 0                | 0                | 0%           | 0%         |
| 25%-50%                         | 3*                                     | 110 <sup>◊</sup> | 44*              | 0                | 2.8%         | 0.2%       |
| 50%-75%                         | 0                                      | 41*              | 218 <sup>◊</sup> | 105*             | 6.7%         | 2.6%       |
| 75%-100%                        | 0                                      | 0                | 0                | 62 <sup>◊</sup>  | 0%           | 0%         |
| <i>NRI CAD patients</i>         |                                        |                  |                  |                  | <b>18%</b>   |            |
| <b>Healthy controls (n=466)</b> |                                        |                  |                  |                  |              |            |
| <25%                            | 2 <sup>◊</sup>                         | 0                | 0                | 0                | 0%           | 0%         |
| 25%-50%                         | 29*                                    | 203 <sup>◊</sup> | 38*              | 0                | 2.9%         | 2.2%       |
| 50%-75%                         | 0                                      | 39*              | 118 <sup>◊</sup> | 27*              | 2%           | 3%         |
| 75%-100%                        | 0                                      | 0                | 0                | 10 <sup>◊</sup>  | 0%           | 0%         |
| <i>NRI controls</i>             |                                        |                  |                  |                  | <b>0.6%</b>  |            |
| <i>NRI total</i>                |                                        |                  |                  |                  | <b>18.7%</b> |            |
| <b>FRS &gt; 20%</b>             |                                        |                  |                  |                  |              |            |
| <b>CAD patients (n=354)</b>     | <25%                                   | 25%-50%          | 50%-75%          | 75%-100%         | % Increase   | % Decrease |
| <25%                            | 0                                      | 0                | 0                | 0                | 0%           | 0%         |
| 25%-50%                         | 0                                      | 26 <sup>◊</sup>  | 0                | 0                | 0%           | 0%         |
| 50%-75%                         | 0                                      | 9*               | 162 <sup>◊</sup> | 32*              | 2%           | 0.6%       |
| 75%-100%                        | 0                                      | 0                | 2*               | 123 <sup>◊</sup> | 0%           | 0.1%       |

| Predicted risk (without GRS)    | Reclassified predicted risk (with GRS) |                 |                 |                 | % Increase | % Decrease |  |
|---------------------------------|----------------------------------------|-----------------|-----------------|-----------------|------------|------------|--|
| <i>NRI CAD patients</i>         |                                        | <i>5.9%</i>     |                 |                 |            |            |  |
| <b>Healthy controls (n=173)</b> |                                        |                 |                 |                 |            |            |  |
| <25%                            | 0                                      | 0               | 0               | 0               | 0%         | 0%         |  |
| 25%-50%                         | 0                                      | 46 <sup>◊</sup> | 0               | 0               | 0%         | 0%         |  |
| 50%-75%                         | 0                                      | 9*              | 85 <sup>◊</sup> | 12*             | 0.9%       | 0.7%       |  |
| 75%-100%                        | 0                                      | 0               | 0               | 21 <sup>◊</sup> | 0%         | 0%         |  |
| <i>NRI controls</i>             |                                        | <i>-1.7%</i>    |                 |                 |            |            |  |
| <i>NRI total</i>                |                                        | <i>4.2%</i>     |                 |                 |            |            |  |

CAD, Coronary Artery Disease; NRI, Net Reclassification Improvement (categorical NRI);

CI, Confidence Interval; GRS, Genetic risk score; FRS, 10-year Framingham risk score.

\*Number of Individuals who were reclassified into higher risk; \*Number of individuals who were reclassified into lower risk; ◊Number of individuals that remained in the same risk group.
